# Supplementary material for: Type 2 Diabetes Risk Alleles Demonstrate Extreme Directional Differentiation among Human Populations, Compared to Other Diseases
Source: PubMed Central journal article supplement (PMC3325177; doi:10.1371/journal.pgen.1002621), 2012-04-12

**rs9939609\_A\_FTO(anc)**  
89 studies on 27 populations  
p (vs. genomic SNPs)= 2.17e-02

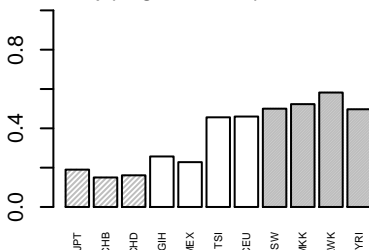

**rs7498665\_G\_SH2B1(anc)**  
13 studies on 7 populations  
p (vs. genomic SNPs)= 1.00e-01

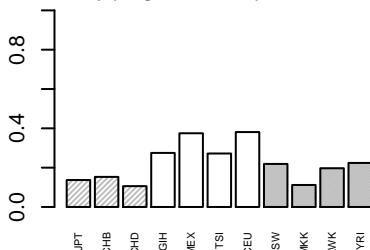

**rs3101336\_C\_**  
8 studies on 7 populations  
p (vs. genomic SNPs)= 5.62e-01

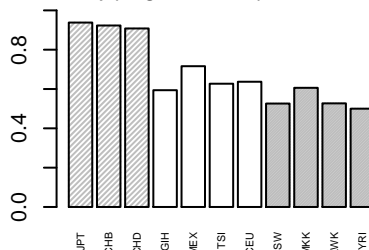

**rs7647305\_C\_**  
6 studies on 7 populations  
p (vs. genomic SNPs)= 6.24e-01

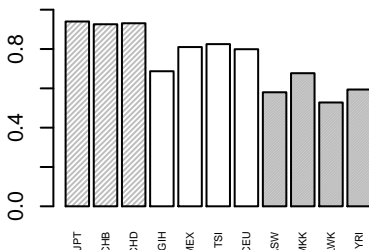

**rs29941\_G\_**  
6 studies on 7 populations  
p (vs. genomic SNPs)= 3.77e-03

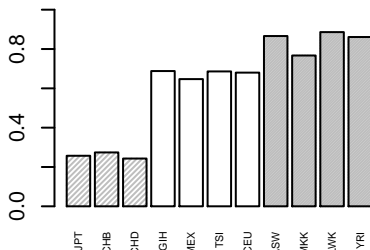

**rs10913469\_C\_SEC16B(anc)**  
5 studies on 7 populations  
p (vs. genomic SNPs)= 1.32e-01

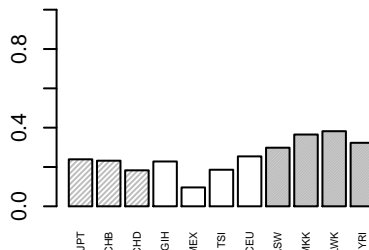

**rs17782313\_C\_**  
30 studies on 6 populations  
p (vs. genomic SNPs)= 1.60e-01

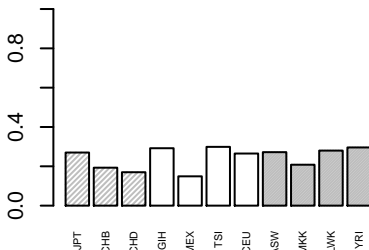

**rs925946\_T\_**  
11 studies on 6 populations  
p (vs. genomic SNPs)= 1.47e-02

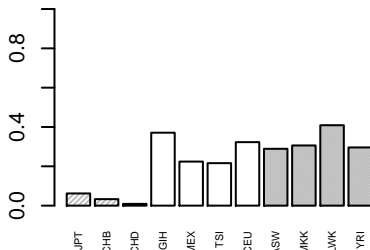

**rs2867125\_C\_(anc)**  
7 studies on 6 populations  
p (vs. genomic SNPs)= 1.53e-01

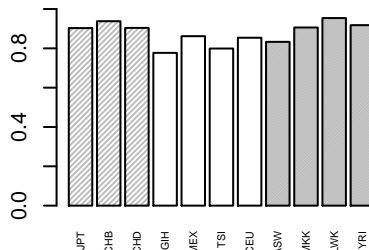

**rs7138803\_A\_**  
7 studies on 6 populations  
p (vs. genomic SNPs)= 2.80e-01

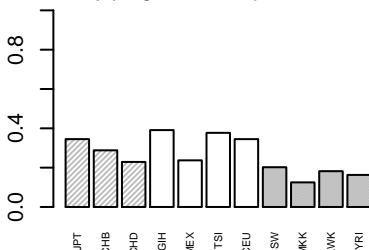

**rs7190492\_G\_FTO(anc)**  
5 studies on 5 populations  
p (vs. genomic SNPs)= 1.29e-01

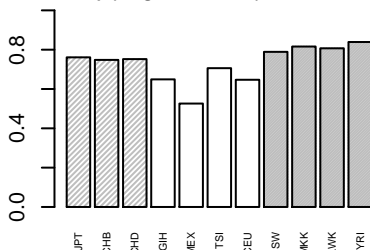

**rs6499640\_A\_FTO(anc)**  
5 studies on 5 populations  
p (vs. genomic SNPs)= 7.09e-03

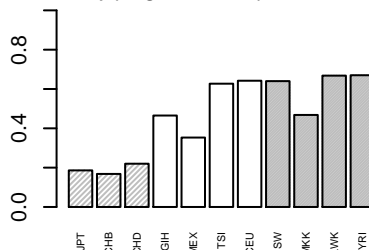

Supplement: pgen.1002621.s007.pdf [file pgen.1002621.s007.pdf]
