# Supplementary material for: Type 2 Diabetes Risk Alleles Demonstrate Extreme Directional Differentiation among Human Populations, Compared to Other Diseases
Source: PubMed Central journal article supplement (PMC3325177; doi:10.1371/journal.pgen.1002621), 2012-04-12

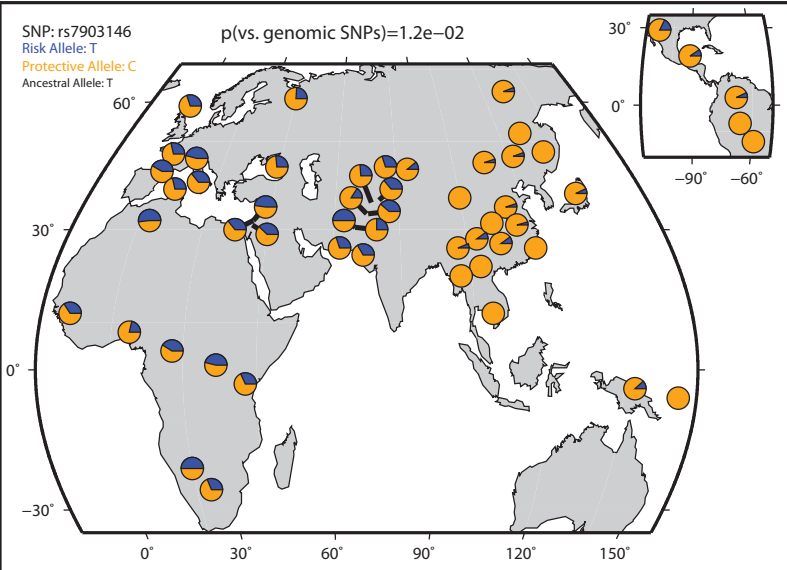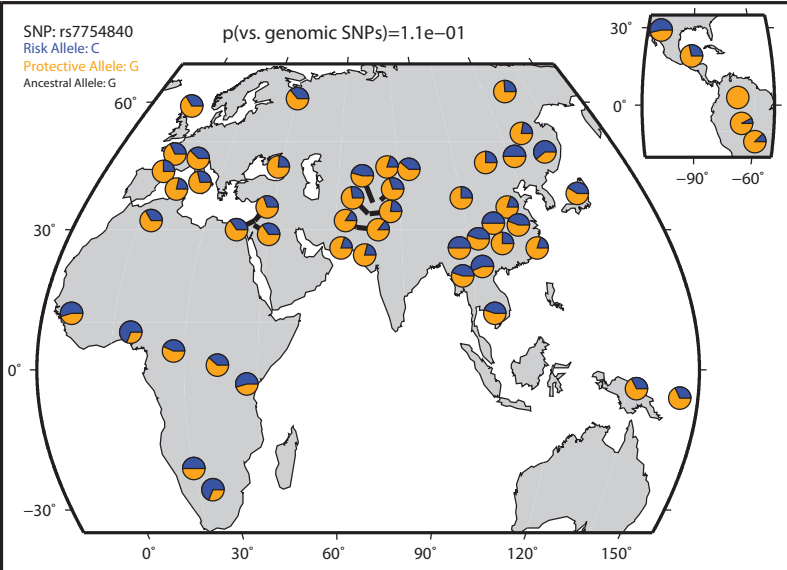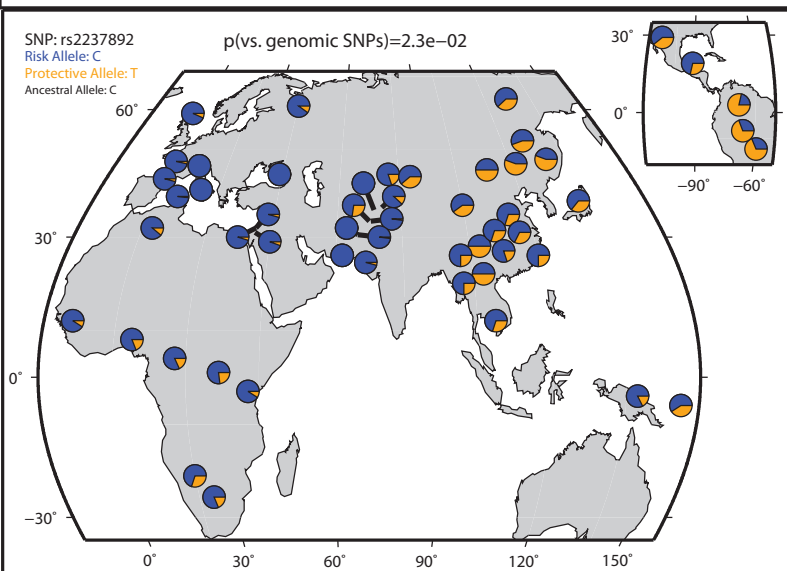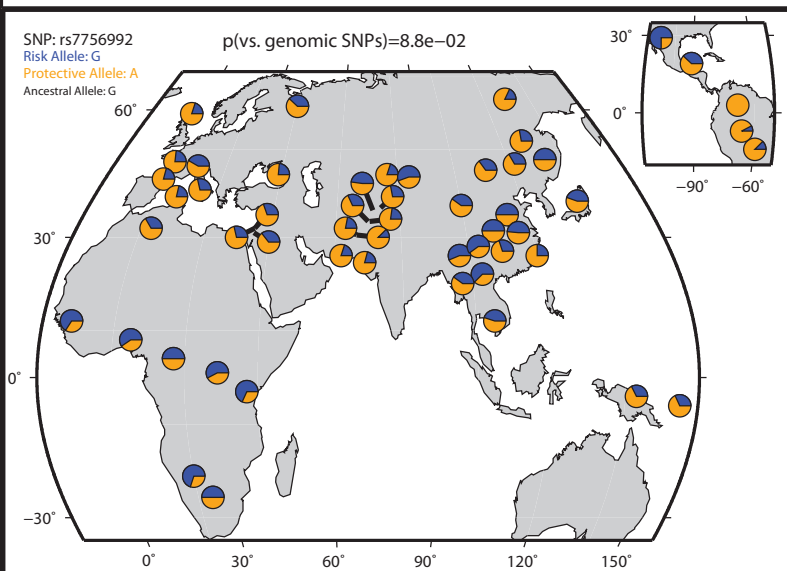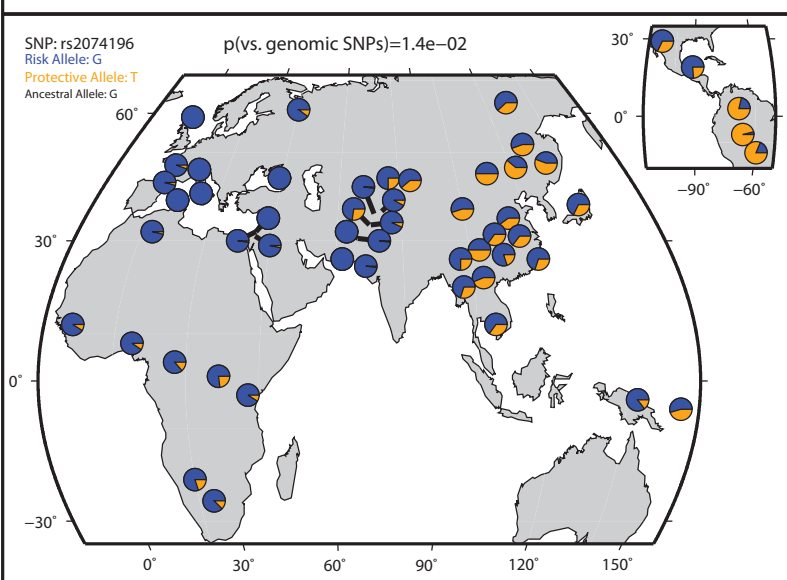

Supplement: pgen.1002621.s002.pdf [file pgen.1002621.s002.pdf]
