# Supplementary material for: Type 2 Diabetes Risk Alleles Demonstrate Extreme Directional Differentiation among Human Populations, Compared to Other Diseases
Source: PubMed Central journal article supplement (PMC3325177; doi:10.1371/journal.pgen.1002621), 2012-04-12
Supplement: pgen.1002621.s008.pdf [file pgen.1002621.s008.pdf]

**Table S1: Significance of T2D association and replication of the 12 cross-ethnic SNPs**

| SNP        | Min(P value)           | Number of populations with $p < 5 \times 10^{-8}$ |
|------------|------------------------|---------------------------------------------------|
| rs7903146  | $5.4 \times 10^{-140}$ | 13                                                |
| rs10811661 | $7.8 \times 10^{-15}$  | 6                                                 |
| rs13266634 | $1.8 \times 10^{-14}$  | 3                                                 |
| rs4402960  | $8.6 \times 10^{-16}$  | 3                                                 |
| rs7754840  | $4.1 \times 10^{-11}$  | 5                                                 |
| rs5219     | $6.7 \times 10^{-11}$  | 3                                                 |
| rs1111875  | $9.1 \times 10^{-15}$  | 4                                                 |
| rs11196205 | $4.6 \times 10^{-8}$   | 1                                                 |
| rs8050136  | $1.7 \times 10^{-17}$  | 2                                                 |
| rs2237892  | $1.7 \times 10^{-42}$  | 4                                                 |
| rs7756992  | $1.9 \times 10^{-12}$  | 3                                                 |
| rs2074196  | $8.6 \times 10^{-34}$  | 4                                                 |
