# Supplementary material for: Type 2 Diabetes Risk Alleles Demonstrate Extreme Directional Differentiation among Human Populations, Compared to Other Diseases
Source: PubMed Central journal article supplement (PMC3325177; doi:10.1371/journal.pgen.1002621), 2012-04-12
Supplement: pgen.1002621.s010.pdf [file pgen.1002621.s010.pdf]

**Table S3: Between-study heterogeneity analysis of allelic odds ratios on T2D risk alleles**

| SNP        | Study counts | Cochran's Q | I <sup>2</sup> |
|------------|--------------|-------------|----------------|
| rs7903146  | 48           | 116.80      | 60%            |
| rs10811661 | 22           | 37.56       | 44%            |
| rs13266634 | 22           | 25.31       | 17%            |
| rs4402960  | 19           | 21.68       | 17%            |
| rs7754840  | 15           | 82.03       | 83%            |
| rs5219     | 10           | 16.38       | 45%            |
| rs1111875  | 14           | 34.32       | 62%            |
| rs11196205 | 7            | 12.91       | 54%            |
| rs8050136  | 9            | 7.94        | 0%             |
| rs2237892  | 6            | 31.51       | 84%            |
| rs7756992  | 15           | 9.49        | 0%             |
| rs2074196  | 2            | 5.34        | 81%            |
