# Supplementary material for: Type 2 Diabetes Risk Alleles Demonstrate Extreme Directional Differentiation among Human Populations, Compared to Other Diseases
Source: PubMed Central journal article supplement (PMC3325177; doi:10.1371/journal.pgen.1002621), 2012-04-12
Supplement: pgen.1002621.s011.pdf [file pgen.1002621.s011.pdf]

**Table S4: Summary of disease-susceptible SNPs used in the figures**

| <b>Disease</b> | <b>Figures</b>    | <b>SNPs</b>                                                                                                                                                                                                                                                                                                 |
|----------------|-------------------|-------------------------------------------------------------------------------------------------------------------------------------------------------------------------------------------------------------------------------------------------------------------------------------------------------------|
| T2D            | S1                | rs5219, rs1111875, rs2074196, rs2237892, rs4402960, rs7754840, rs7756992, rs7903146, rs8050136, rs10811661, rs11196205, rs13266634                                                                                                                                                                          |
|                | 1, S3, 3A, 3B, 6A | rs1111875, rs2237892, rs4402960, rs7754840, rs7756992, rs7903146, rs8050136, rs10811661, rs11196205, rs13266634                                                                                                                                                                                             |
|                | 2+S2              | rs1111875, rs2074196, rs2237892, rs4402960, rs7754840, rs7756992, rs7903146, rs8050136, rs10811661, rs11196205, rs13266634                                                                                                                                                                                  |
|                | 3C, 3D, 4, 5      | rs1111875, rs2074196, rs2237892, 4402960, rs7754840, rs7756992, rs7903146, rs8050136, rs10811661, rs11196205, rs13266634                                                                                                                                                                                    |
|                | 7A                | rs564398, rs864745, rs1111875, rs1153188, rs1470579, rs1617640, rs2237892, rs2641348, rs4402960, rs4607103, rs7172432, rs7578597, rs7593730, rs7754840, rs7756992, rs7901695, rs7903146, rs7961581, rs8050136, rs9465871, rs9939609, rs10811661, rs10923931, rs11196205, rs12243326, rs12255372, rs13266634 |
|                | 7B                | rs7901695, rs7903146                                                                                                                                                                                                                                                                                        |
|                | 7C                | rs2237892, rs4402960, rs5015480, rs7754840, rs7756992, rs7901695, rs9465871, rs10811661, rs13266634                                                                                                                                                                                                         |
|                | 7D                | rs1111875, rs2237892, rs3802177, rs4402960, rs5015480, rs7578597, rs7754840, rs7756992, rs7901695, rs8050136, rs10811661, rs13266634                                                                                                                                                                        |
|                | 7E                | rs4402960, rs4506565, rs7903146, rs12255372                                                                                                                                                                                                                                                                 |
|                | 8                 | rs243021, rs340874, rs864745, rs896854, rs1111875, rs1470579, rs1531343, rs1552224, rs1801282, rs4607103, rs7578326, rs7578597, rs7754840, rs7903146, rs7961581, rs10811661, rs10923931, rs11634397, rs11708067, rs13266634                                                                                 |

|                    |            |                                                                                                                                                                                                                                                                                                                                                                                                                                                                                                                    |
|--------------------|------------|--------------------------------------------------------------------------------------------------------------------------------------------------------------------------------------------------------------------------------------------------------------------------------------------------------------------------------------------------------------------------------------------------------------------------------------------------------------------------------------------------------------------|
|                    | 9A         | rs5219, rs564398, rs864745, rs1111875, rs1153188, rs1359790, rs1436955, rs1470579, rs1617640, rs2074196, rs2237892, rs2237895, rs2237897, rs2383208, rs2970847, rs3802177, rs4402960, rs4607103, rs4712524, rs5015480, rs6769511, rs7172432, rs7578597, rs7593730, rs7754840, rs7756992, rs7895340, rs7901695, rs7903146, rs7961581, rs8050136, rs9295475, rs9300039, rs9465871, rs9939609, rs10010131, rs10811661, rs10906115, rs10923931, rs11196205, rs12243326, rs12255372, rs12779790, rs13266634, rs17036101 |
|                    | 9B         | rs564398, rs864745, rs1111875, rs1153188, rs1359790, rs1436955, rs1470579, rs1617640, rs2237892, rs2383208, rs2641348, rs2970847, rs3802177, rs4402960, rs4607103, rs5015480, rs6769511, rs7172432, rs7578597, rs7593730, rs7754840, rs7756992, rs7901695, rs7903146, rs7961581, rs8050136, rs9295475, rs9465871, rs9939609, rs10811661, rs10906115, rs10923931, rs11196205, rs12243326, rs12255372, rs13266634                                                                                                    |
|                    | S4, S5, S6 | rs864745, rs1111875, rs2237892, rs4402960, rs7754840, rs7903146, rs8050136, rs10811661, rs11196205, rs13266634                                                                                                                                                                                                                                                                                                                                                                                                     |
| Breast cancer      | 4,5        | rs1219648, rs3803662, rs3817198, rs4415084, rs10941679, rs13387042                                                                                                                                                                                                                                                                                                                                                                                                                                                 |
|                    | S5, S6     | rs889312, rs1219648, rs3803662, rs4973768, rs13387042                                                                                                                                                                                                                                                                                                                                                                                                                                                              |
|                    | 4, 5       | rs842647, rs917997, rs1464510, rs1738074, rs2327832, rs2816316, rs3184504, rs6441961, rs6822844, rs9811792, rs13151961, rs17810546                                                                                                                                                                                                                                                                                                                                                                                 |
| Celiac disease     | S5, S6     | rs653178, rs917997, rs1464510, rs1893217, rs2327832, rs2816316, rs6822844, rs11221332, rs11734090, rs12642902, rs13098911, rs13151961, rs17810546                                                                                                                                                                                                                                                                                                                                                                  |
|                    | 4, 5       | rs181359, rs212388, rs736289, rs1004819, rs1250550, rs1343151, rs2066844, rs2076756, rs2241880, rs2476601, rs2542151, rs2838519, rs2872507, rs3024505, rs3197999, rs3764147, rs4809330, rs6478108, rs6556412, rs6908425, rs7517847, rs7554511, rs10489629, rs10758669, rs10761659, rs10883365, rs10889677, rs11209026, rs12720356, rs17293632                                                                                                                                                                      |
| Crohn's disease    | S5, S6     | rs181359, rs1250550, rs1343151, rs2188962, rs2201841, rs2241880, rs2476601, rs2542151, rs2838519, rs2872507, rs3024505, rs3197999, rs3764147, rs3810936, rs6556412, rs6908425, rs7517847, rs10758669, rs10761659, rs11209026, rs12720356, rs17293632                                                                                                                                                                                                                                                               |
|                    | 4, 5       | rs2104286, rs3135388, rs6498169, rs6897932, rs12044852, rs12722489                                                                                                                                                                                                                                                                                                                                                                                                                                                 |
| Multiple sclerosis | S5, S6     | rs2076530, rs3135338, rs3135388, rs6897932, rs7382297, rs9267954, rs12722489                                                                                                                                                                                                                                                                                                                                                                                                                                       |

|                                    |          |                                                                                                                                                                                                                                                         |
|------------------------------------|----------|---------------------------------------------------------------------------------------------------------------------------------------------------------------------------------------------------------------------------------------------------------|
| Obesity                            | 4, 5     | rs6235, rs29941, rs925946, rs2867125, rs3101336, rs6499640, rs7138803, rs7190492, rs7498665, rs7647305, rs9939609, rs10913469, rs17782313                                                                                                               |
|                                    | S5, S6   | rs29941, rs987237, rs2867125, rs7138803, rs7190492, rs7498665, rs8044769, rs9939609, rs10938397, rs17782313                                                                                                                                             |
|                                    | S7       | rs29941, rs925946, rs2867125, rs3101336, rs6499640, rs7138803, rs7190492, rs7498665, rs7647305, rs9939609, rs10913469, rs17782313                                                                                                                       |
| Prostate cancer                    | 4, 5, 6E | rs445114, rs1016343, rs1447295, rs1859962, rs4430796, rs5945619, rs6465657, rs6983267, rs7931342, rs9364554, rs10993994, rs16901979                                                                                                                     |
|                                    | S5, S6   | rs620861, rs1016343, rs1447295, rs1512268, rs2735839, rs4430796, rs5945619, rs6983267, rs7931342, rs10808556, rs10993994, rs13252298, rs16901979                                                                                                        |
| Psoriasis                          | 4, 5     | rs20541, rs610604, rs2082412, rs2201841, rs4112788, rs12191877, rs17728338                                                                                                                                                                              |
|                                    | S5, S6   | rs610604, rs1265181, rs2082412, rs2201841, rs4112788, rs6887695, rs10484554, rs17728338                                                                                                                                                                 |
| Rheumatoid arthritis               | 4, 5     | rs2476601, rs3761847, rs4750316, rs4810485, rs6822844, rs6920220, rs7574865, rs10499194                                                                                                                                                                 |
|                                    | S5, S6   | rs1953126, rs2076530, rs2476601, rs3087243, rs3135363, rs4750316, rs4810485, rs6457617, rs6822844, rs6859219, rs6920220, rs7574865                                                                                                                      |
| Systemic lupus erythematosus (SLE) | 4, 5     | rs130073, rs416352, rs419132, rs707929, rs729302, rs805301, rs1264419, rs1265087, rs2187668, rs2227139, rs2395153, rs2395175, rs2476601, rs3024866, rs3024877, rs3024896, rs3130299, rs3131379, rs3132571, rs7574865, rs9888739, rs10484565, rs13277113 |
|                                    | S5, S6   | rs2187668, rs2205960, rs2248932, rs2431697, rs3131379, rs4548893, rs4963128, rs6445975, rs6568431, rs7574865, rs9888739, rs10516487, rs12537284, rs13277113                                                                                             |
| T1D                                | 4, 5, 6D | rs763361, rs1445898, rs1990760, rs2104286, rs2292239, rs2358994, rs2476601, rs2542151, rs3087243, rs3184504, rs3764021, rs7529353, rs12251307, rs12708716, rs17696376                                                                                   |
|                                    | S5, S6   | rs763361, rs1893217, rs1990760, rs2104286, rs2292239, rs2476601, rs3087243, rs3184504, rs9272346, rs11594656, rs12708716, rs13330041, rs17696736                                                                                                        |
| Ulcerative colitis                 | 4, 5     | rs1558744, rs1801274, rs2201841, rs2395185, rs2836878, rs3024505, rs3806308, rs6426833, rs10758669, rs11209026, rs17085007                                                                                                                              |
|                                    | S5, S6   | rs1558744, rs1801274, rs2395185, rs2836878, rs3024505, rs3806308, rs6017342, rs6426833, rs11209026                                                                                                                                                      |
| Colorectal cancer                  | 6B       | rs6983267, rs10505477                                                                                                                                                                                                                                   |

|                     |    |                                                                                                                                                                                                                           |
|---------------------|----|---------------------------------------------------------------------------------------------------------------------------------------------------------------------------------------------------------------------------|
| Cleft palate        | 6C | rs742071, rs8069536, rs17352100                                                                                                                                                                                           |
| Parkinson's disease | 6F | rs356220, rs393152, rs2736990, rs3857059, rs17563986                                                                                                                                                                      |
| Lung cancer         | 6G | rs401681, rs1051730, rs2736100, rs16969968                                                                                                                                                                                |
| Melanoma            | 9C | rs258322, 401681, rs1126809, rs1335510, rs1393350, rs1805007, rs1805008, rs1847142, rs2218220, rs2284063, rs2353033, rs4238833, rs4778138, rs4785763, rs7023329, rs7188458, rs8059973, rs10757257, rs12918773, rs16891982 |
|                     | 9D | rs258322, rs401681, rs1335510, rs1393350, rs1805007, rs2218220, rs2284063, rs2353033, rs4238833, rs4778138, rs4785763, rs6001027, rs7023329, rs7188458, rs8059973, rs10757257, rs12918773                                 |
