# Supplementary material for: Type 2 Diabetes Risk Alleles Demonstrate Extreme Directional Differentiation among Human Populations, Compared to Other Diseases
Source: PubMed Central journal article supplement (PMC3325177; doi:10.1371/journal.pgen.1002621), 2012-04-12
Supplement: pgen.1002621.s012.pdf [file pgen.1002621.s012.pdf]

**Table S5: Statistical significance of ethnic disparity of PGR across 11 HapMap3 populations on 40 diseases**

| disease                          | p_Asi   | p_Eur   | p_Afr   | SNPs |
|----------------------------------|---------|---------|---------|------|
| Type 2 diabetes                  | 3.0E-05 | 0.81    | 4.7E-03 | 10   |
| Colorectal cancer                | 1.3E-03 | 0.03    | 5.7E-04 | 2    |
| Cleft palate                     | 1.4E-02 | 0.78    | 0.16    | 3    |
| Schizophrenia                    | 0.11    | 0.44    | 0.03    | 1    |
| Crohn's disease                  | 0.12    | 0.74    | 0.29    | 20   |
| Atrial fibrillation              | 0.13    | 0.32    | 0.70    | 1    |
| Glioma                           | 0.14    | 0.07    | 0.97    | 14   |
| Multiple sclerosis               | 0.14    | 0.35    | 0.58    | 5    |
| Bladder cancer                   | 0.17    | 0.60    | 0.72    | 8    |
| Osteoarthritis                   | 0.18    | 0.34    | 0.35    | 1    |
| Migraine                         | 0.21    | 0.34    | 0.65    | 1    |
| Restless legs syndrome           | 0.30    | 0.23    | 0.91    | 6    |
| Pseudoexfoliation syndrome       | 0.38    | 0.21    | 0.83    | 1    |
| Exfoliation glaucoma             | 0.38    | 0.21    | 0.83    | 1    |
| Type 1 diabetes                  | 0.38    | 5.0E-03 | 2.6E-02 | 15   |
| Age related macular degeneration | 0.40    | 0.84    | 0.45    | 2    |
| Psoriatic arthritis              | 0.41    | 0.13    | 0.90    | 4    |
| Follicular lymphoma              | 0.42    | 0.59    | 0.59    | 3    |
| Systemic sclerosis               | 0.46    | 0.11    | 0.95    | 3    |
| Systemic lupus erythematosus     | 0.46    | 0.56    | 0.77    | 23   |
| Obesity                          | 0.53    | 0.25    | 0.40    | 12   |
| Myocardial infarction            | 0.53    | 0.48    | 0.37    | 1    |
| Coronary artery disease          | 0.54    | 0.48    | 0.36    | 1    |
| Rheumatoid arthritis             | 0.56    | 0.83    | 0.51    | 8    |
| Prostate cancer                  | 0.56    | 0.02    | 0.05    | 12   |
| Amyotrophic lateral sclerosis    | 0.59    | 0.32    | 0.93    | 1    |
| Breast cancer                    | 0.60    | 0.43    | 0.37    | 6    |
| Melanoma                         | 0.61    | 0.94    | 0.51    | 1    |
| Inflammatory bowel disease       | 0.61    | 0.52    | 0.92    | 2    |
| Parkinson's disease              | 0.63    | 5.7E-04 | 0.99    | 5    |
| Lung cancer                      | 0.67    | 0.05    | 0.65    | 4    |
| Psoriasis                        | 0.72    | 0.53    | 0.89    | 7    |
| Essential tremor                 | 0.80    | 0.47    | 0.35    | 1    |
| Alzheimer's disease              | 0.87    | 0.74    | 0.87    | 3    |
| Intracranial aneurysm            | 0.91    | 0.15    | 0.45    | 5    |
| Celiac disease                   | 0.91    | 0.40    | 0.69    | 11   |

|                              |      |      |      |    |
|------------------------------|------|------|------|----|
| Ulcerative colitis           | 0.92 | 0.68 | 0.94 | 11 |
| Asthma                       | 0.93 | 0.15 | 0.37 | 1  |
| Chronic lymphocytic leukemia | 0.95 | 0.12 | 0.22 | 1  |
| Hodgkin's lymphoma           | 0.98 | 0.99 | 0.90 | 1  |
