# Supplementary material for: Type 2 Diabetes Risk Alleles Demonstrate Extreme Directional Differentiation among Human Populations, Compared to Other Diseases
Source: PLOS journal article supplement (doi:10.1371/journal.pgen.1002621), 2012-04-12

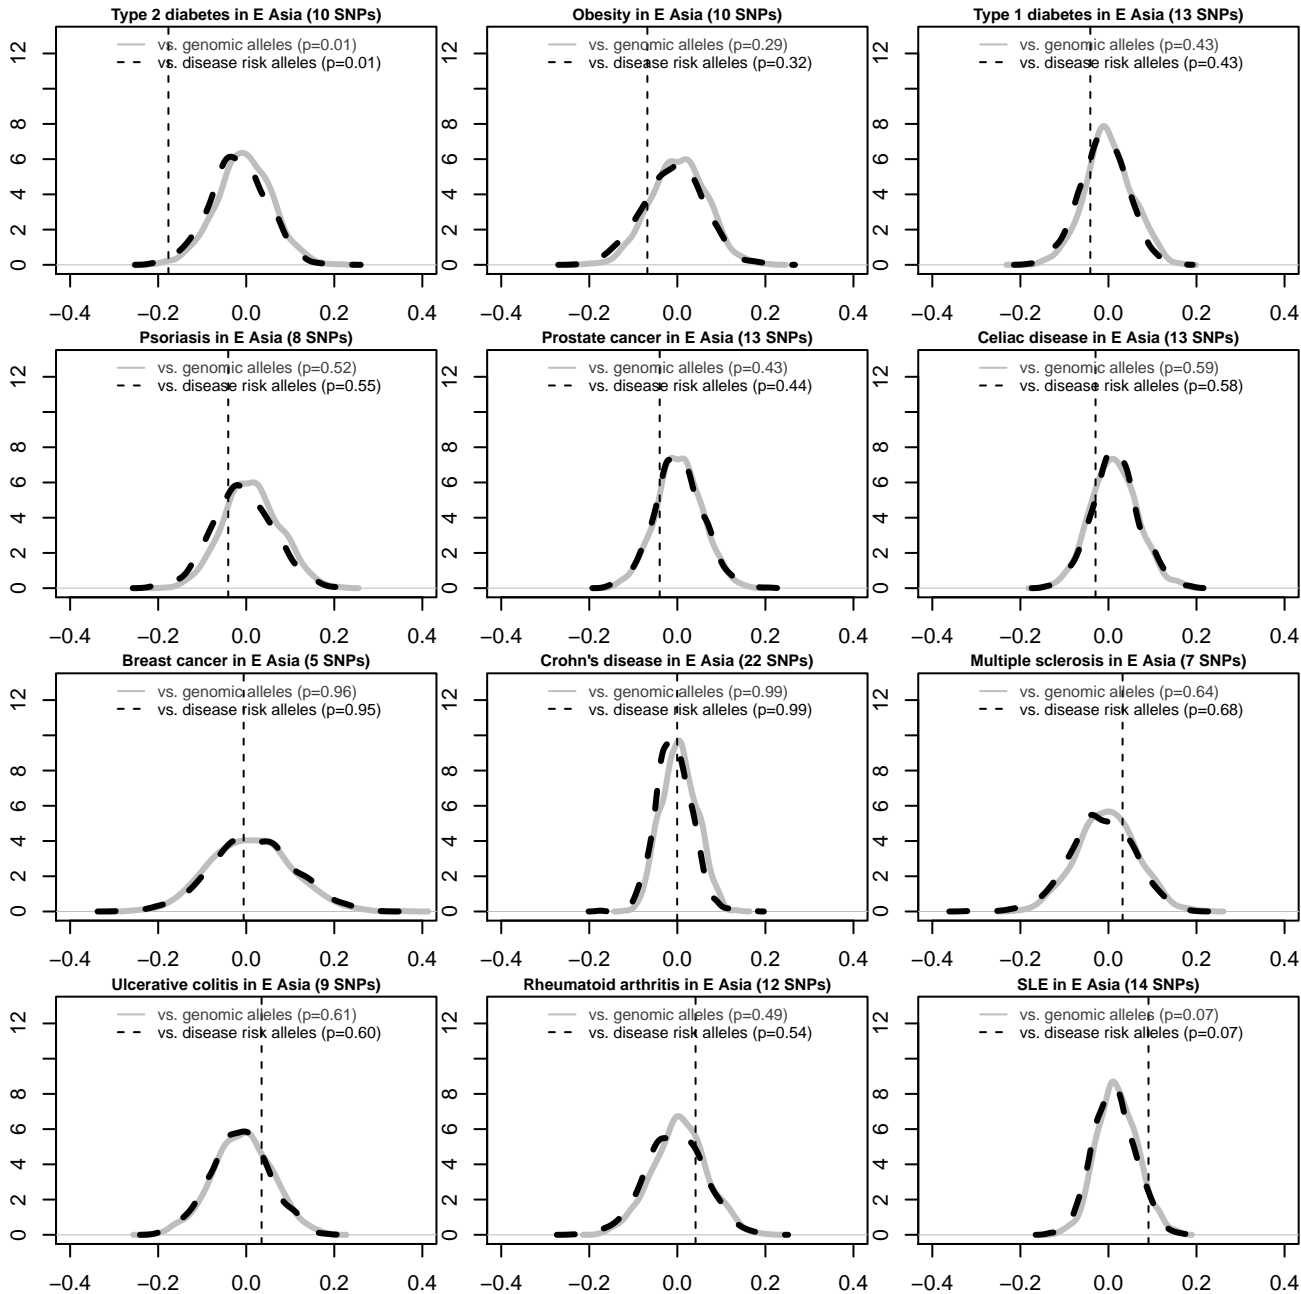

Supplement: S5 (10.1371/journal.pgen.1002621.s005) [file journal.pgen.1002621.s005]
